# Supplementary material for: Laccase-Mediator System Using a Natural Mediator as a Whitening Agent for the Decolorization of Melanin
Source: MDPI journal article supplement (doi:10.3390/polym13213671), 2021-10-25
Supplement: s1 [file s1]

# Supplementary

1

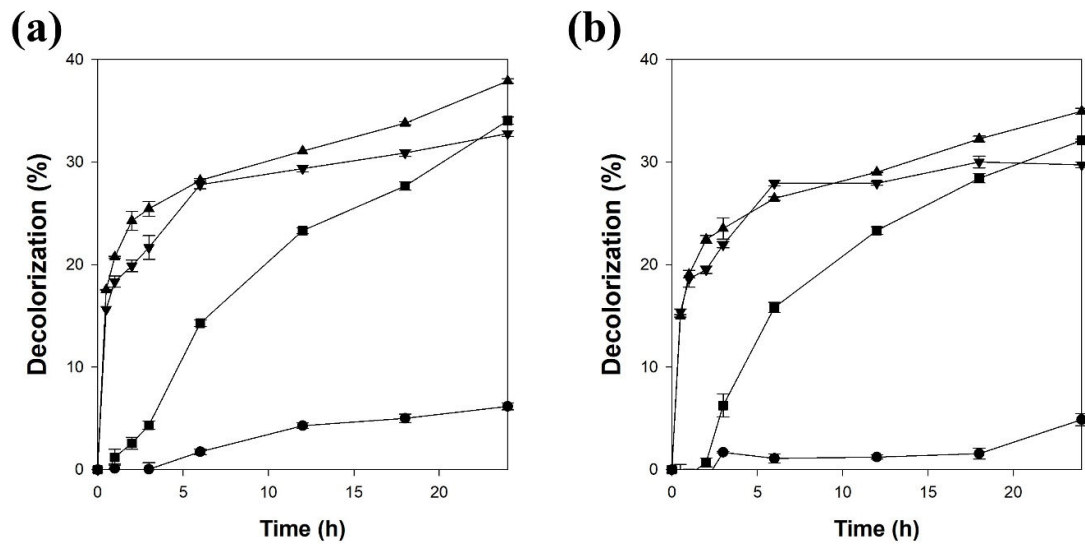

**Figure S1.** The melanin decolorization by LMS using laccase from *T. versicolor* (a) and *M. thermophila* (b). ●: no mediator, ▲: acetosyringone, ▼: syringaldehyde, ■: acetovanillone.

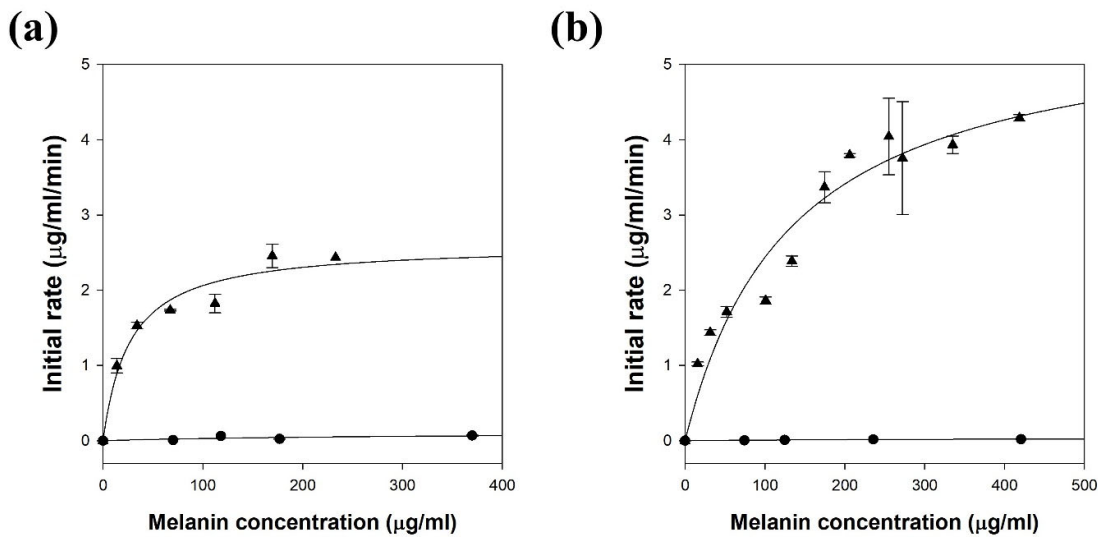

**Figure S2.** The initial rate for the melanin decolorization reaction by the laccase from *T. versicolor* (a) and *M. thermophila* (b). ●: no mediator, ▲: acetosyringone.

2

3

4

5

6

7

8
